# Supplementary material for: FBXL7 Body Hypomethylation Is Frequent in Tumors from the Digestive and Respiratory Tracts and Is Associated with Risk-Factor Exposure
Source: MDPI journal article supplement (doi:10.3390/ijms23147801), 2022-07-15
Supplement: s1 [file s1]

Supplementary File 1: Summary of the patients included in the methylome analysis, by tumor type.

|                 | <b>ESCC</b> | <b>LSCC</b> | <b>OCSCC</b> | <b>OPSCC</b> |
|-----------------|-------------|-------------|--------------|--------------|
| Gender          |             |             |              |              |
| Male            | 21          | 18          | 15           | 8            |
| Female          | 3           | 2           | 1            | -            |
| Age             |             |             |              |              |
| <60             | 14          | 6           | 11           | 3            |
| ≥60             | 7           | 14          | 4            | 5            |
| Smoking history |             |             |              |              |
| Yes             | 22          | 16          | 12           | 8            |
| No              | 1           | 3           | 3            | -            |
| NA              | 1           | 1           | -            | -            |
| Alcohol history |             |             |              |              |
| Yes             | 20          | 7           | 11           | 8            |
| No              | 3           | 7           | 4            | -            |
| NA              | 1           | 1           | -            | -            |
| HPV status      |             |             |              |              |
| Positive        | NA          | NA          | NA           | 5            |
| Negative        | NA          | NA          | NA           | 3            |

ESCC: esophageal squamous cell carcinoma; LSCC: laryngeal squamous cell carcinoma; OCSCC: oral cavity squamous cell carcinoma; OPSCC: oropharynx squamous cell carcinoma; NA: not available.
