# Supplementary material for: FBXL7 Body Hypomethylation Is Frequent in Tumors from the Digestive and Respiratory Tracts and Is Associated with Risk-Factor Exposure
Source: MDPI journal article supplement (doi:10.3390/ijms23147801), 2022-07-15
Supplement: s1 [file s1]

Supplementary File 2: Sensitivity, specificity, and accuracy values of each methylome probe mapping to *FBXL7* to distinguish non-tumor surrounding tissues ad esophageal squamous cell carcinoma.

| Rank sorted<br>by accuracy | Probe      | Sensitivity | Specificity | Accuracy<br>(AUC) |
|----------------------------|------------|-------------|-------------|-------------------|
| 1                          | cg11339964 | 0.9583      | 0.9375      | 0.9818            |
| 2                          | cg04001359 | 0.9167      | 1.00        | 0.9661            |
| 3                          | cg24640610 | 0.9167      | 0.9375      | 0.9479            |
| 4                          | cg13394491 | 0.9167      | 0.9375      | 0.9453            |
| 5                          | cg09051630 | 0.8333      | 1.00        | 0.9453            |
| 6                          | cg24185447 | 0.8333      | 1.00        | 0.9297            |
| 7                          | cg25936482 | 0.9167      | 0.9375      | 0.9219            |
| 8                          | cg11005831 | 0.8333      | 0.9375      | 0.9193            |
| 9                          | cg18631301 | 0.9167      | 0.8125      | 0.9115            |
| 10                         | cg20328399 | 0.75        | 1.00        | 0.8932            |
| 11                         | cg26233084 | 0.75        | 1.00        | 0.8906            |
| 12                         | cg18620300 | 0.75        | 1.00        | 0.888             |
| 13                         | cg15540341 | 0.875       | 0.8125      | 0.8828            |
| 14                         | cg01572460 | 0.7917      | 0.9375      | 0.8672            |
| 15                         | cg13373080 | 0.6667      | 1.00        | 0.8568            |
| 16                         | cg00664723 | 0.75        | 0.8125      | 0.8542            |
| 17                         | cg13998890 | 0.7083      | 0.9375      | 0.8516            |
| 18                         | cg20771687 | 0.7917      | 1.00        | 0.8464            |
| 19                         | cg18373623 | 0.8333      | 0.8125      | 0.8411            |
| 20                         | cg02519948 | 0.8333      | 0.8125      | 0.8411            |
| 21                         | cg20011459 | 0.6667      | 0.875       | 0.8333            |
| 22                         | cg19641327 | 0.7917      | 0.875       | 0.8255            |
| 23                         | cg06055044 | 0.8333      | 0.6875      | 0.8177            |
| 24                         | cg08792955 | 0.7083      | 0.8125      | 0.8047            |
| 25                         | cg23041295 | 0.4583      | 1.00        | 0.7891            |
| 26                         | cg18202928 | 0.75        | 0.875       | 0.7813            |
| 27                         | cg07238450 | 0.9167      | 0.5625      | 0.7734            |
| 28                         | cg01149929 | 0.5833      | 1.00        | 0.7734            |
| 29                         | cg25623727 | 0.8333      | 0.6875      | 0.7656            |
| 30                         | cg00960263 | 0.5         | 1.00        | 0.763             |
| 31                         | cg05023415 | 0.5833      | 1.00        | 0.7578            |
| 32                         | cg07856071 | 0.6667      | 0.9375      | 0.7474            |
| 33                         | cg14667871 | 1           | 0.375       | 0.7161            |
| 34                         | cg16679007 | 0.7917      | 0.6875      | 0.7083            |
| 35                         | cg16641358 | 0.6667      | 0.9375      | 0.7083            |
| 36                         | cg10047595 | 1           | 0.375       | 0.7031            |
| 37                         | cg19632594 | 0.7917      | 0.625       | 0.6979            |
| 38                         | cg02704181 | 0.5833      | 0.8125      | 0.6849            |
| 39                         | cg06577205 | 0.4167      | 0.9375      | 0.6563            |
| 40                         | cg24872782 | 0.75        | 0.625       | 0.6432            |
| 41                         | cg15108430 | 0.4167      | 0.9375      | 0.638             |
| 42                         | cg26134895 | 0.5833      | 0.75        | 0.6198            |
| 43                         | cg00219774 | 0.4167      | 0.875       | 0.5755            |
| 44                         | cg06468166 | 0.2917      | 0.9375      | 0.5599            |
| 45                         | cg08849558 | 0.9167      | 0.50        | 0.5521            |
| 46                         | cg14583673 | 0.4167      | 0.6875      | 0.5156            |
| 47                         | cg08235984 | 0.7083      | 0.4375      | 0.513             |
| 48                         | cg12910969 | 0.6667      | 0.50        | 0.4948            |
